# Supplementary material
Source: PubMed Central journal article supplement (PMC4055832)

# Supplemental Figure 1

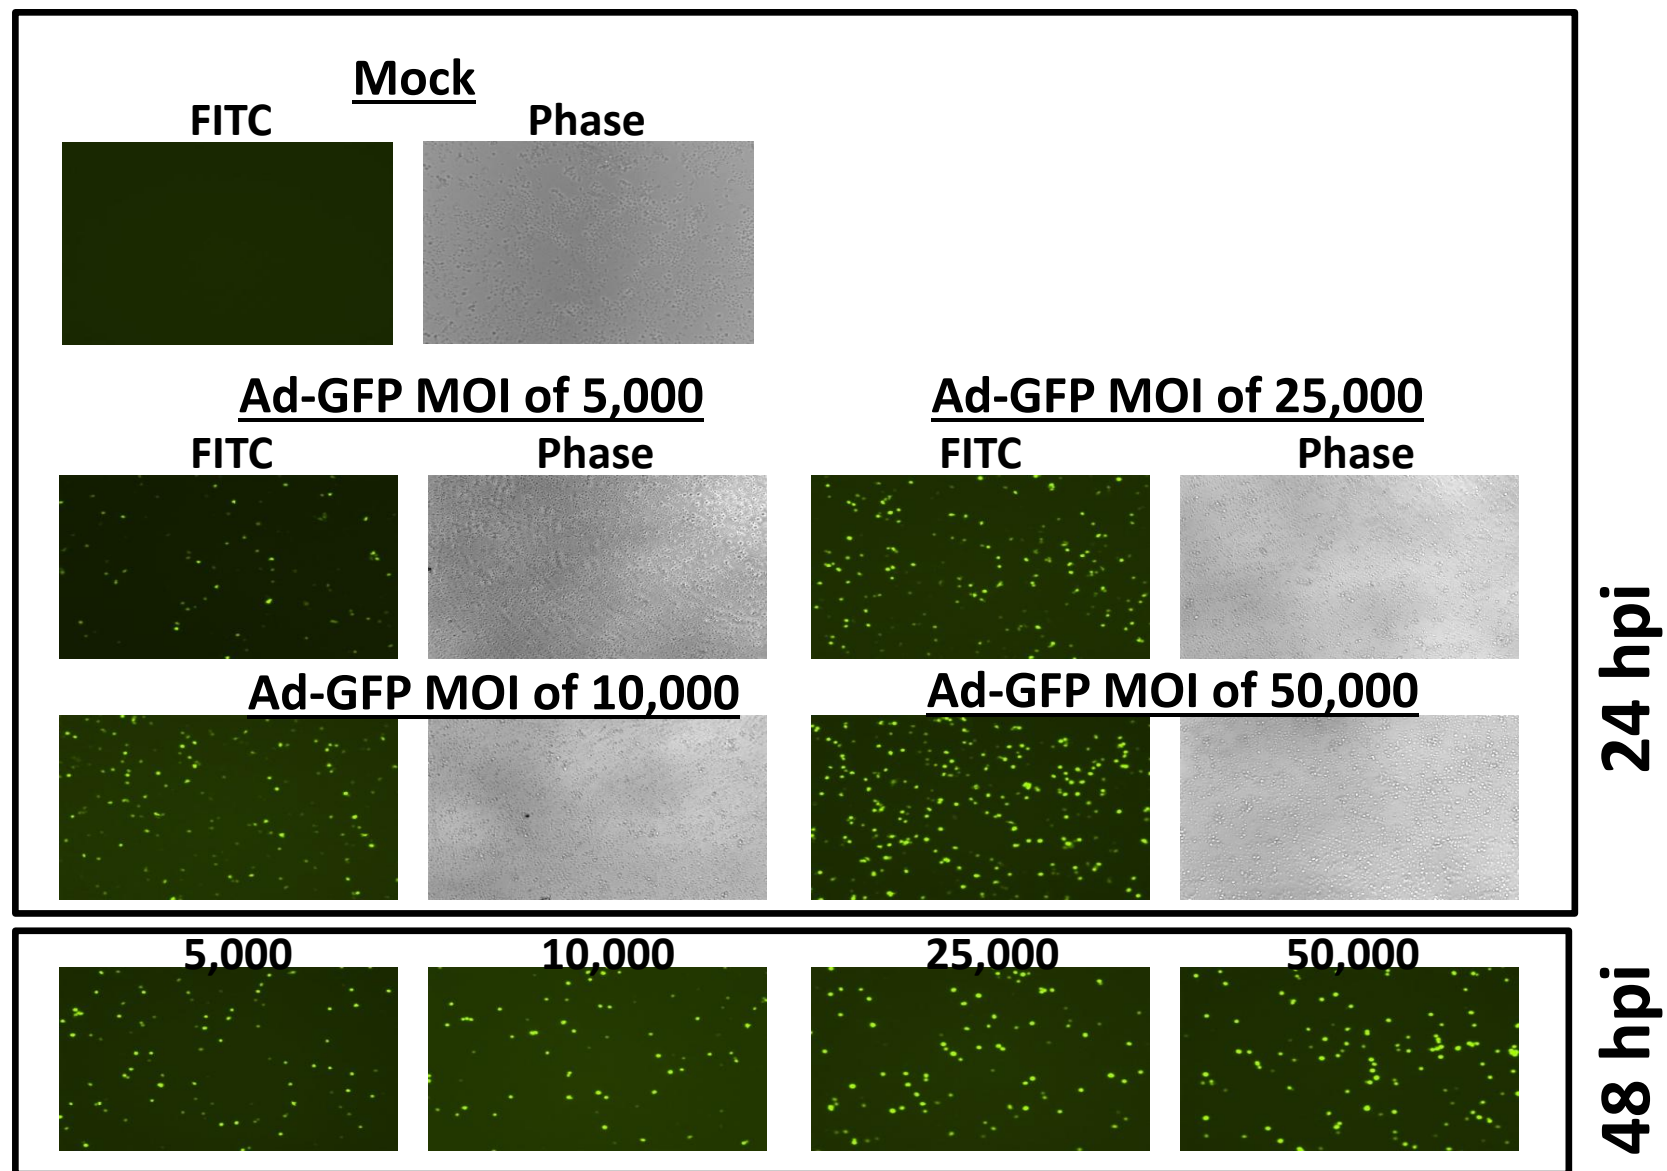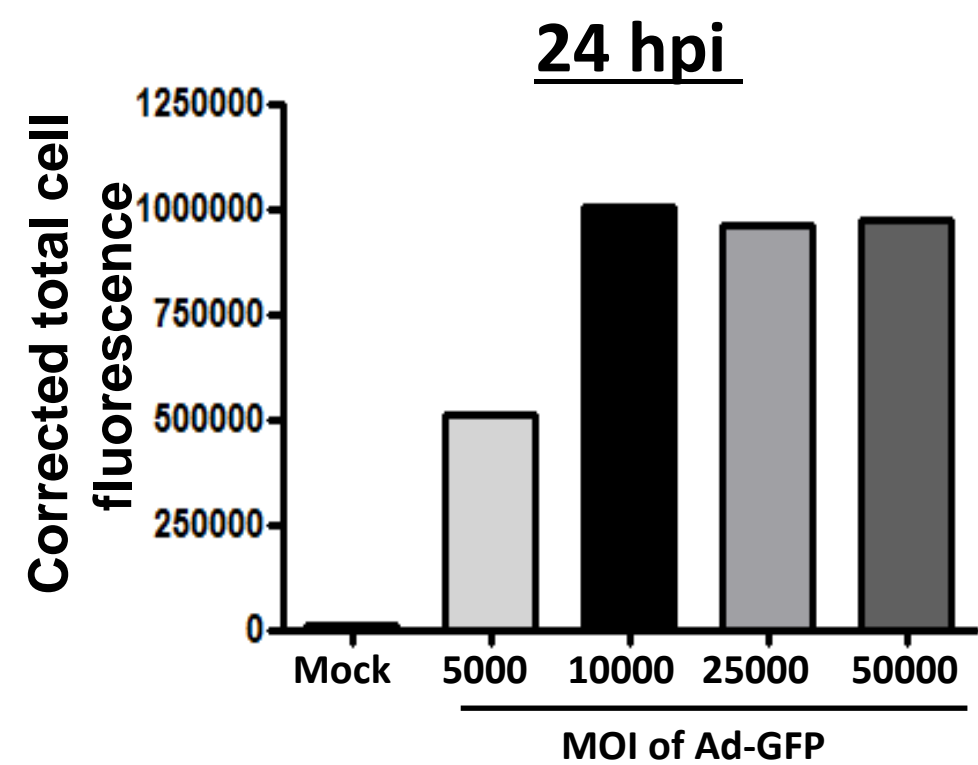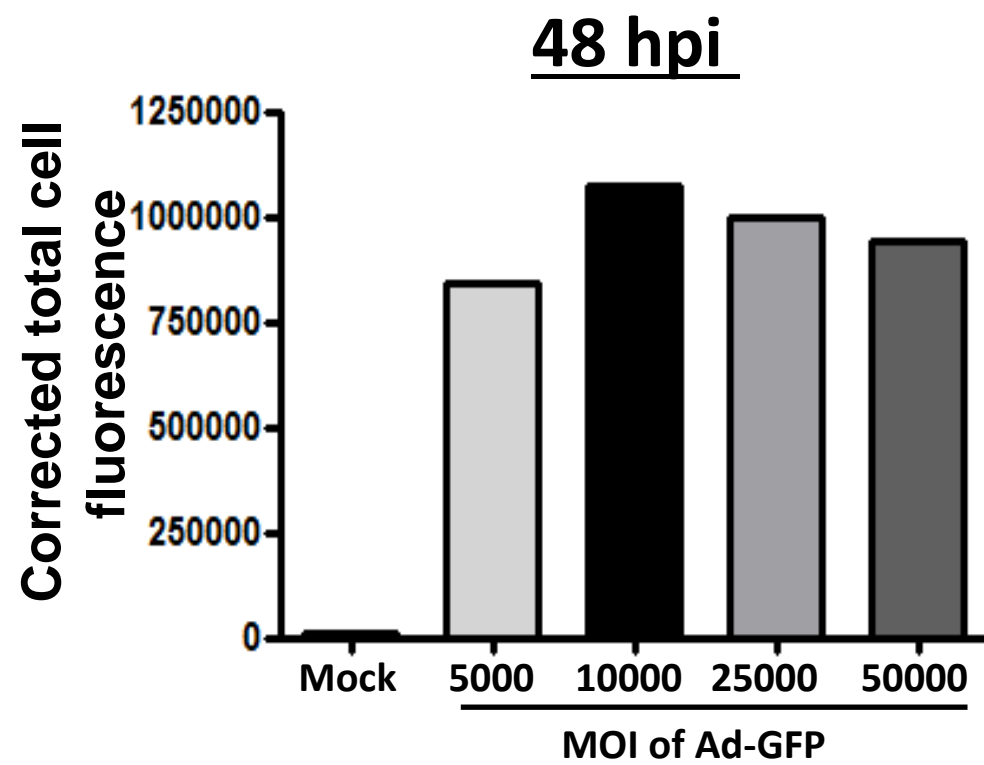

Supplement: supp_dxt061_S1__New_.pdf [file supp_dxt061_S1__New_.pdf]

# Supplemental Figure: 2

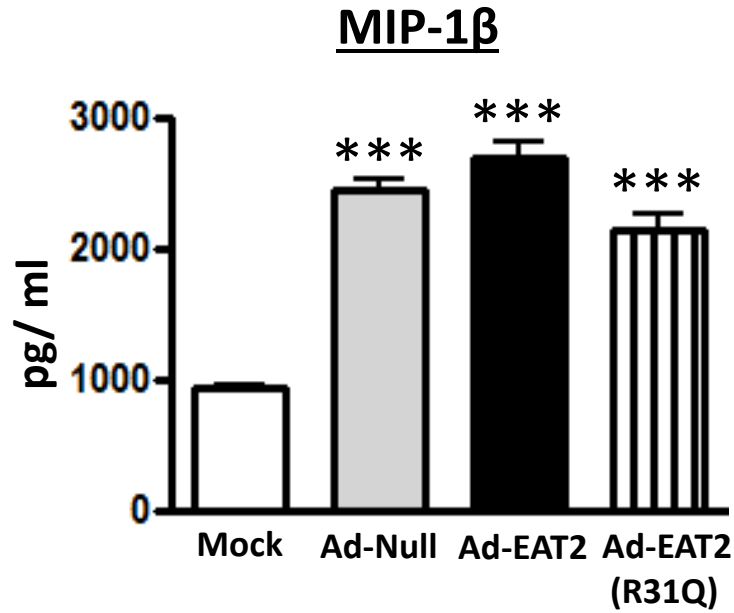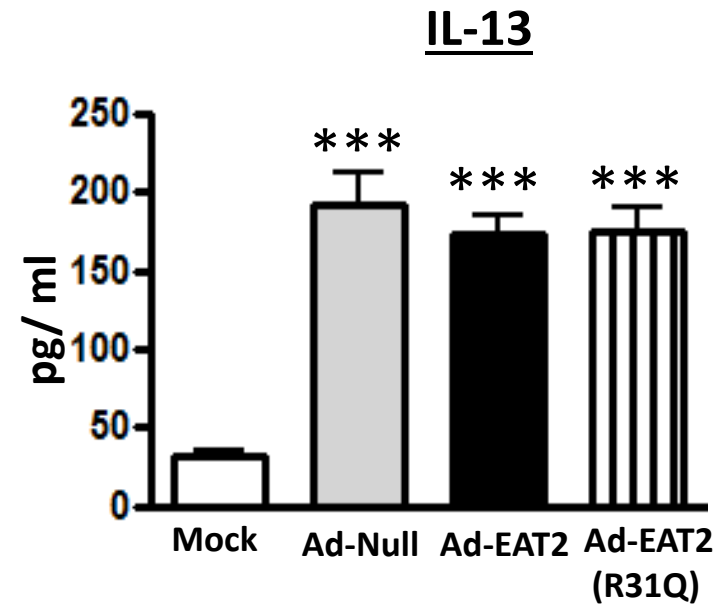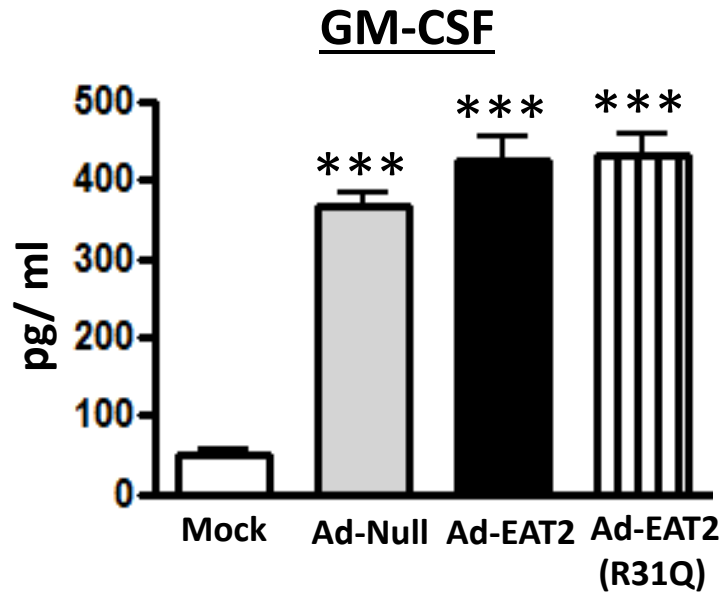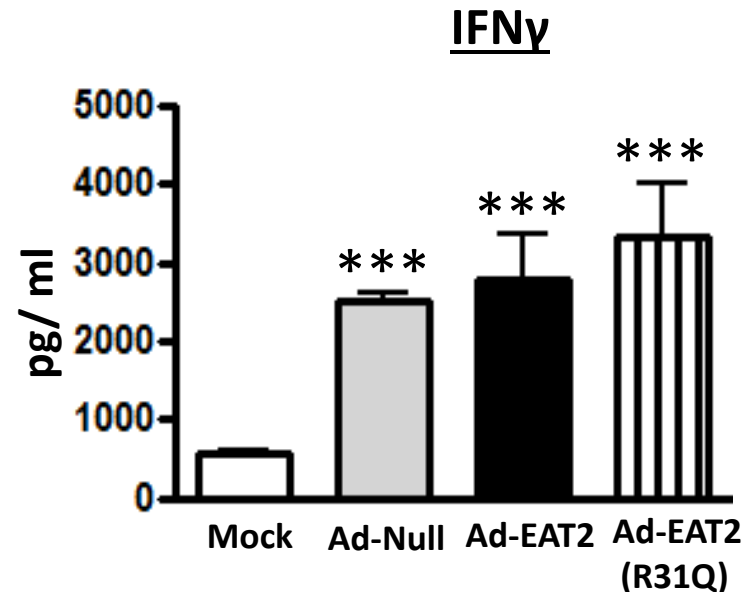

Supplement: supp_dxt061_S2.pdf [file supp_dxt061_S2.pdf]

# Supplemental Figure: 3

## ELISA for human IL-1β

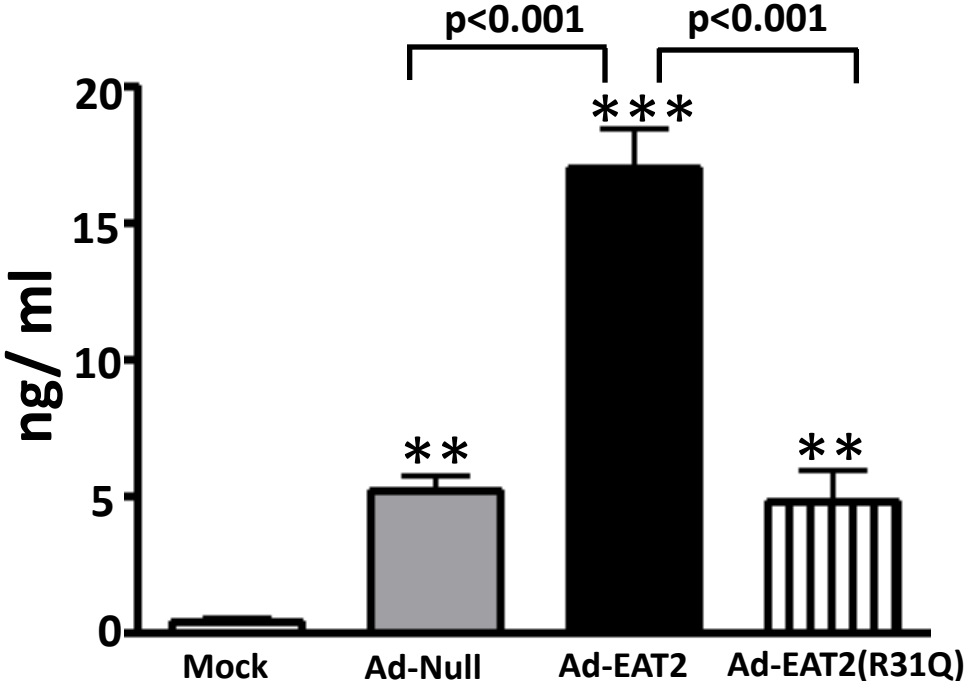

Supplement: supp_dxt061_S3.pdf [file supp_dxt061_S3.pdf]

# Supplemental Figure: 4

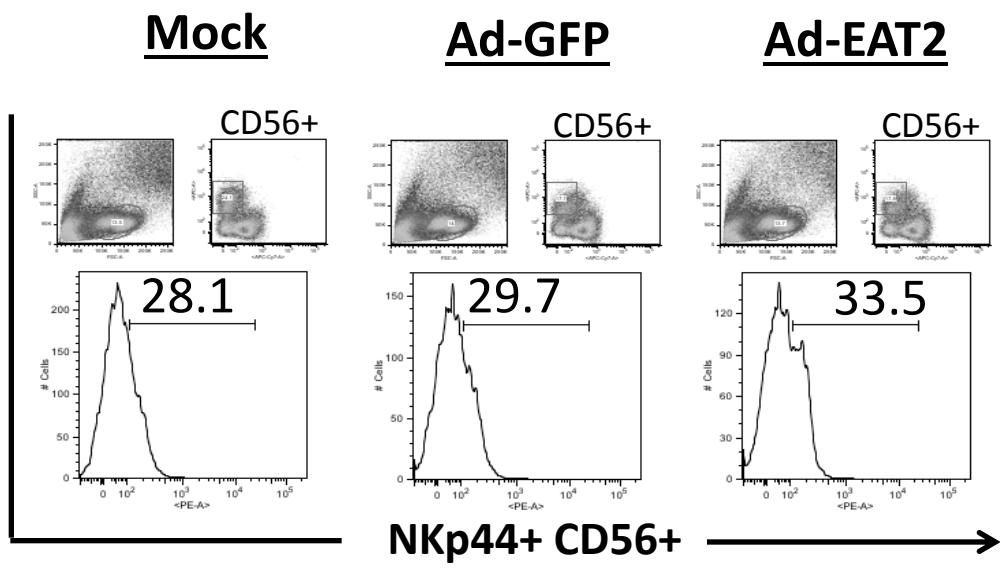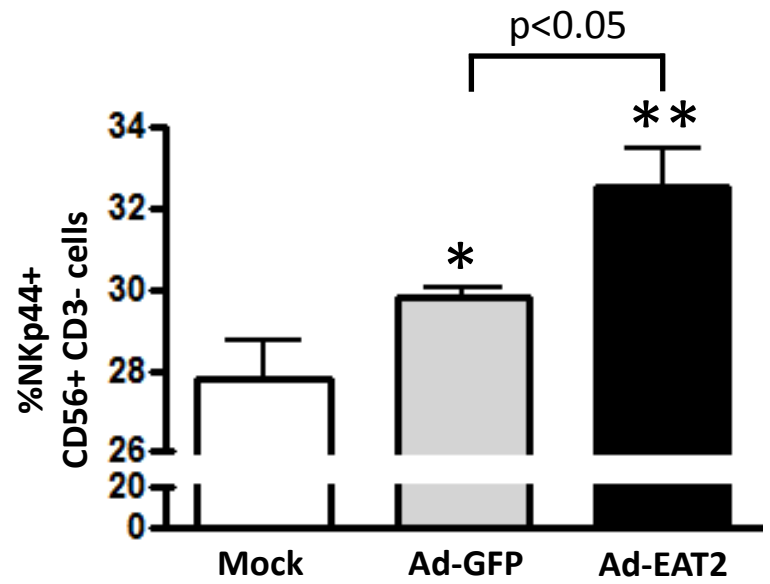

Supplement: supp_dxt061_S4.pdf [file supp_dxt061_S4.pdf]
